# Supplementary material for: Recent Advances in the Enzymatic Synthesis of Polyester
Source: Polymers (Basel). 2022 Nov 22;14(23):5059. doi: 10.3390/polym14235059 (PMC9740404; doi:10.3390/polym14235059)
Supplement: Supplementary file 1 [file polymers-14-05059-s001.zip › polymers-2026166-supplementary.pdf]

**Figure S1.** Structural figures of lipases were rendered using Pymol (The PyMOL Molecular Graphics System, Version 2.5.4 Schrödinger, LLC), involving five images, detailed below.

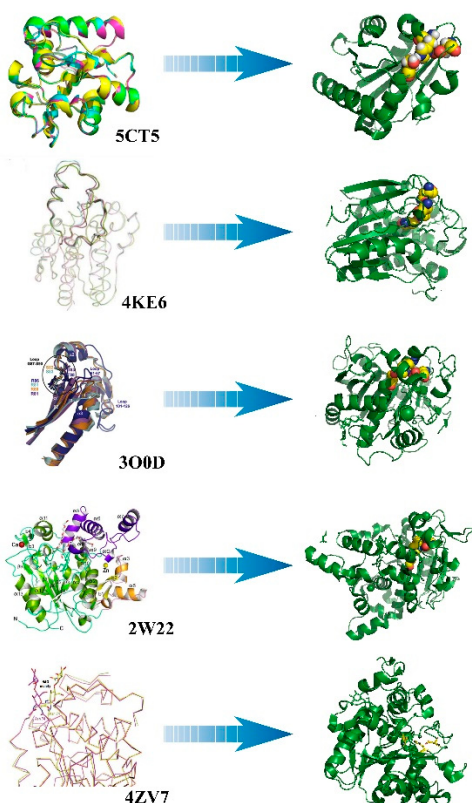

The licenses of five original images, detailed below:

### (1) PDB ID: 5CT5

#### License Details

This Agreement between Dr. Hong Wang ("You") and John Wiley and Sons ("John Wiley and Sons") consists of your license details and the terms and conditions provided by John Wiley and Sons and Copyright Clearance Center.

[Print](#) [Copy](#)

|                                                                                            |                                                                                        |
|--------------------------------------------------------------------------------------------|----------------------------------------------------------------------------------------|
| License Number                                                                             | 5418621482221                                                                          |
| License date                                                                               | Oct 30, 2022                                                                           |
| Licensed Content Publisher                                                                 | John Wiley and Sons                                                                    |
| Licensed Content Publication                                                               | ChemBioChem                                                                            |
| Licensed Content Title                                                                     | Crystallographic Investigation of Imidazolium Ionic Liquid Effects on Enzyme Structure |
| Licensed Content Author                                                                    | Joel L. Kaar, Marcelo C. Sousa, Jared R. Snell, et al                                  |
| Licensed Content Date                                                                      | Oct 14, 2015                                                                           |
| Licensed Content Volume                                                                    | 16                                                                                     |
| Licensed Content Issue                                                                     | 17                                                                                     |
| Licensed Content Pages                                                                     | 4                                                                                      |
| Type of Use                                                                                | Journal/Magazine                                                                       |
| Requestor type                                                                             | University/Academic                                                                    |
| Is the reuse sponsored by or associated with a pharmaceutical or medical products company? | no                                                                                     |
| Format                                                                                     | Electronic                                                                             |
| Portion                                                                                    | Figure/table                                                                           |
| Number of figures/tables                                                                   | 1                                                                                      |
| Will you be translating?                                                                   | No                                                                                     |
| Circulation                                                                                | 50000 or greater                                                                       |
| Title of new article                                                                       | Recent advances in the enzymatic synthesis of polyester                                |
| Lead author                                                                                | Hong Wang, Guan Seng Tay                                                               |
| Title of targeted journal                                                                  | polymers                                                                               |
| Publisher                                                                                  | Multidisciplinary Digital Publishing Institute                                         |
| Expected publication date                                                                  | Nov 2022                                                                               |
| Order reference number                                                                     | 30/10/2022-1                                                                           |
| Portions                                                                                   | Supplemental Figures: Figure S1                                                        |
| Requestor Location                                                                         | Dr. Hong Wang<br>General Delivery                                                      |
| Publisher Tax ID                                                                           | Penagys, other<br>Malaysia<br>Attn: Dr. Hong Wang<br>EU826007151                       |
| Total                                                                                      | <b>0.00 USD</b>                                                                        |

<https://s100.copyright.com/MyAccount/viewLicenseDetails?ref=90e52b7e-61af-44e9-822a-a97cfce3effd>

### (2) PDB ID: 4KE6

This is an open access article distributed under the terms of the Creative Commons CC-BY license.

<https://s100.copyright.com/AppDispatchServlet?publisherName=ELS&contentID=S0021925820487101&orderBeanReset=true&orderSource=Phoenix>

### (3) PDB ID: 3O0D

#### License Details

This Agreement between Dr. Hong Wang ("You") and Elsevier ("Elsevier") consists of your license details and the terms and conditions provided by Elsevier and Copyright Clearance Center.

[Print](#) [Copy](#)

|                                              |                                                                                                            |
|----------------------------------------------|------------------------------------------------------------------------------------------------------------|
| License Number                               | 5418661211439                                                                                              |
| License date                                 | Oct 30, 2022                                                                                               |
| Licensed Content Publisher                   | Elsevier                                                                                                   |
| Licensed Content Publication                 | Biophysical Journal                                                                                        |
| Licensed Content Title                       | Exploring the Conformational States and Rearrangements of Yarrowia lipolytica Lipase                       |
| Licensed Content Author                      | Florence Bordes, Sophie Barbe, Pierre Escalier, Lionel Mourey, Isabelle André, Alain Marty, Samuel Tranier |
| Licensed Content Date                        | Oct 6, 2010                                                                                                |
| Licensed Content Volume                      | 99                                                                                                         |
| Licensed Content Issue                       | 7                                                                                                          |
| Licensed Content Pages                       | 10                                                                                                         |
| Type of Use                                  | reuse in a journal/magazine                                                                                |
| Requestor type                               | academic/educational institute                                                                             |
| Portion                                      | figures/tables/illustrations                                                                               |
| Number of figures/tables/illustrations       | 1                                                                                                          |
| Format                                       | electronic                                                                                                 |
| Are you the author of this Elsevier article? | No                                                                                                         |
| Will you be translating?                     | No                                                                                                         |
| Title of new article                         | Recent advances in the enzymatic synthesis of polyester                                                    |
| Lead author                                  | Hong Wang, Guan Seng Tay                                                                                   |
| Title of targeted journal                    | polymers                                                                                                   |
| Publisher                                    | MDPI AG                                                                                                    |
| Expected publication date                    | Nov 2022                                                                                                   |
| Order reference number                       | 30/10/2022-2                                                                                               |
| Portions                                     | Figure 2                                                                                                   |
| Requestor Location                           | Dr. Hong Wang<br>General Delivery                                                                          |
|                                              | Penang, other<br>Malaysia<br>Attn: Dr. Hong Wang<br>GB 494 6272 12                                         |
| Publisher Tax ID                             |                                                                                                            |
| Total                                        | 0.00 USD                                                                                                   |

<https://s100.copyright.com/MyAccount/viewLicenseDetails?ref=7f7b93cc-1466-4966-9467-59e03f1a535c>

### (4) PDB ID: 2W22

This is an open access article distributed under the terms of the Creative Commons CC-BY license.

<https://s100.copyright.com/AppDispatchServlet?publisherName=ELS&contentID=S0021925820710380&orderBeanReset=true&orderSource=Phoenix>

### (5) PDB ID: 4ZV7

This is an open access article distributed under the terms of the Creative Commons Attribution-ShareAlike 4.0 International (CC BY-SA 4.0) license.

<https://ojs.ptbioch.edu.pl/index.php/abp/article/view/1683>
